# Supplementary material for: Supply of Methionine During Late-Pregnancy Alters Fecal Microbiota and Metabolome in Neonatal Dairy Calves Without Changes in Daily Feed Intake
Source: Front Microbiol. 2019 Sep 19;10:2159. doi: 10.3389/fmicb.2019.02159 (PMC6761860; doi:10.3389/fmicb.2019.02159)
Supplement: TABLE S1 — Ingredient and nutrient composition of far-off (−45 to −29 days relative to parturition) and close-up (from −28 days to parturition) maternal diets. [file Table_1.docx]

*Supplementary Material*

**Supply of Methionine During Late-Pregnancy Alters Fecal Microbiome and Metabolome in Neonatal Dairy Calves without Changes in Daily Feed Intake**

Ahmed Elolimy1,2, Mohamed Zeineldin3,4, Abdulrahman Alharthi1,2, Claudia Parys5,Ariane Helmbrecht5, Juan J. Loor1,2,6,*

1Mammalian NutriPhysioGenomics, Department of Animal Sciences, University of Illinois, Urbana, Illinois, USA. 2Department of Animal Sciences, University of Illinois, Urbana, IL.3Integrated Food Animal Management Systems, Department of Veterinary Clinical Medicine, University of Illinois, Urbana, Illinois, USA. 4Department of Animal Medicine, College of Veterinary Medicine, Benha University, Egypt. 5Evonik Nutrition & Care GmbH, Hanau-Wolfgang, Germany. 6Division of Nutritional Sciences, Illinois Informatics Institute, University of Illinois, Urbana, Illinois, USA.

***Correspondence:** Dr. Juan J. Loor, jloor@illinois.edu

**TABLE S1.** Ingredient and nutrient composition of far-off (−45 d to −29 d relative to parturition) and close-up (from −28 d to parturition) maternal diets.

| **Ingredient, % of DM** | **Far-off** | **Close-up** |
| --- | --- | --- |
| Alfalfa haylage | — | 6.55 |
| Corn silage | 34.7 | 26.6 |
| Wheat straw | 33.7 | 26.5 |
| Corn grain, ground, dry | — | 12.6 |
| Cottonseed | — | — |
| Molasses, beet sugar | — | 4.03 |
| Soybean hulls | 15.7 | 3.46 |
| Soybean meal, 48% CP | 12.0 | 7.83 |
| Expeller soybean meal[1](https://www.sciencedirect.com/science/article/pii/S0022030217306689?via%3Dihub" \l "tbl1fn1) | — | 5.80 |
| Protein supplement[2](https://www.sciencedirect.com/science/article/pii/S0022030217306689?via%3Dihub" \l "tbl1fn2) | — | 0.78 |
| Urea | 0.46 | 0.59 |
| Soychlor[3](https://www.sciencedirect.com/science/article/pii/S0022030217306689?via%3Dihub" \l "tbl1fn3) | — | 1.23 |
| Saturated fat supplement[4](https://www.sciencedirect.com/science/article/pii/S0022030217306689?via%3Dihub" \l "tbl1fn4) | — | — |
| Limestone | — | — |
| Salt | 0.40 | — |
| Dicalcium phosphate | 0.50 | 0.52 |
| Magnesium oxide | — | — |
| Magnesium sulfate | 1.90 | 2.08 |
| Sodium bicarbonate | — | — |
| Mineral vitamin mix[5](https://www.sciencedirect.com/science/article/pii/S0022030217306689?via%3Dihub" \l "tbl1fn5) | 0.40 | 0.17 |
| Vitamin A[6](https://www.sciencedirect.com/science/article/pii/S0022030217306689?via%3Dihub" \l "tbl1fn6) | — | 0.03 |
| Vitamin D[7](https://www.sciencedirect.com/science/article/pii/S0022030217306689?via%3Dihub" \l "tbl1fn7) | — | 0.03 |
| Vitamin E[8](https://www.sciencedirect.com/science/article/pii/S0022030217306689?via%3Dihub" \l "tbl1fn8) | 0.40 | 0.60 |
| Biotin[9](https://www.sciencedirect.com/science/article/pii/S0022030217306689?via%3Dihub" \l "tbl1fn9) | — | 0.70 |
| Momensin[10](https://www.sciencedirect.com/science/article/pii/S0022030217306689?via%3Dihub" \l "tbl1fn10) | 0.01 | — |
| Ethyl-cellulose RPM[11](https://www.sciencedirect.com/science/article/pii/S0022030217306689?via%3Dihub" \l "tbl1fn11) | — | 0.09 |

1SoyPlus, West Central Soy (Ralston, IA, USA).

2ProVAAl AADvantage, Perdue AgriBusiness (Salisbury, MD, USA).

3West Central Soy.

4Energy Booster 100, Milk Specialties Global (Eden Prairie, MN, USA).

5Contained a minimum of 5% Mg, 10% S, 7.5% K, 2.0% Fe, 3.0% Zn, 3.0% Mn, 5,000 mg of Cu/kg, 250 mg of I/kg, 40 mg of Co/kg, 150 mg of Se/kg, 2,200 kIU of vitamin A/kg, 660 kIU of vitamin D3/kg, and 7,700 IU of vitamin E/kg.

6Contained 30,000 kIU/kg.

7Contained 5,000 kIU/kg.

8Contained 44,000 kIU/kg.

9ADM Animal Nutrition (Quincy, IL, USA).

10Rumensin, Elanco Animal Health (Greenfield, IN, USA).

11Ethyl-cellulose rumen-protected methionine, Evonik Nutrition and Care GmbH (Hanau-Wolfgang, Germany). Added only in the treatment group.

**TABLE S2.** Nutrient composition (mean ± standard deviation) and diet evaluation using NRC (2001) of maternal diets fed to multiparous Holstein cows prepartum.

| **Item** | **Far-off** | **Close-up** | |
| --- | --- | --- | --- |
| **CON** | **MET** |
| Chemical composition, % DM |  |  |  |
| CP | 13.9 ± 0.25 | 15.6 ± 0.32 | 15.7 ± 0.32 |
| NDF | 54.5 ± 0.75 | 40.8 ± 0.68 | 40.7 ± 0.68 |
| ADF | 36.9 ± 0.65 | 27.5 ± 0.50 | 27.4 ± 0.50 |
| NFC | 24.7 ± 0.72 | 34.9 ± 0.81 | 34.9 ± 0.81 |
| Ether extract | 1.81 ± 0.04 | 2.32 ± 0.05 | 2.33 ± 0.05 |
| Calculated using NRC (2001)[1](https://www.sciencedirect.com/science/article/pii/S0022030217306689?via%3Dihub" \l "tbl2fn1) |  |  |  |
| NEL, Mcal/kg of DM | 1.33 | 1.47 | 1.47 |
| RDP, % of DM2 | 8.8 | 9.4 | 9.4 |
| RUP, % of DM3 | 5.1 | 6.2 | 6.3 |
| RDP required, g/d | 1,149 | 1,194 | 1,196 |
| RDP supplied, g/d | 1,157 | 1,204 | 1,203 |
| RDP balance, g/d | 8 | 10 | 7 |
| RUP required, g/d | 131 | 119 | 130 |
| RUP supplied, g/d | 668 | 793 | 924 |
| RUP balance, g/d | 537 | 673 | 794 |
| MP required, g/d4 | 790 | 808 | 808 |
| MP supplied, g/d | 1,211 | 1,363 | 1,473 |
| MP balance, g/d | 421 | 555 | 664 |
| Lysine , % of MP | 6.74 | 6.54 | 6.51 |
| MP-Lysine, g | 82 | 89 | 89 |
| Methionine, % of MP | 1.77 | 1.73 | 2.30 |
| MP-Methionine, g | 21 | 24 | 32 |
| Lysine:Methionine | 3.81:1 | 3.71:1 | 2.81:1 |

1The NRC (2001) evaluation of diets was based on final averaged prepartum DMI, production data, and feed analysis.

2Rumen degradable protein

3Rumen undegradable protein

4Metabolozable protein

**TABLE S3.** Number of 16S rRNA amplicon sequences (± standard deviation) in feces at birth and during the preweaning period in heifer calves born to cows offered a control diet (CON, n = 13) supplemented with ethyl-cellulose rumen-protected methionine (MET, n = 13; Mepron® at 0.09% of diet DM; Evonik Nutrition & Care GmbH, Germany) compared with heifer calves born to cows offered a control diet (CON, n = 13) during the last 28 d of pregnancy

| **Day** | **CON** | **MET** |
| --- | --- | --- |
| 0 | 58,460 ± 19,589 | 58,117 ± 24,864 |
| 14 | 59,304 ± 18,198 | 57,384 ± 14,636 |
| 28 | 47,300 ± 17,237 | 45,955 ± 10,961 |
| 42 | 57,599 ± 18,513 | 56,120 ± 11,354 |
